# Supplementary material for: Protein-Mediated Carotenoid Delivery Suppresses the Photoinducible Oxidation of Lipofuscin in Retinal Pigment Epithelial Cells
Source: MDPI journal article supplement (doi:10.3390/antiox12020413), 2023-02-08
Supplement: s1 [file s1]

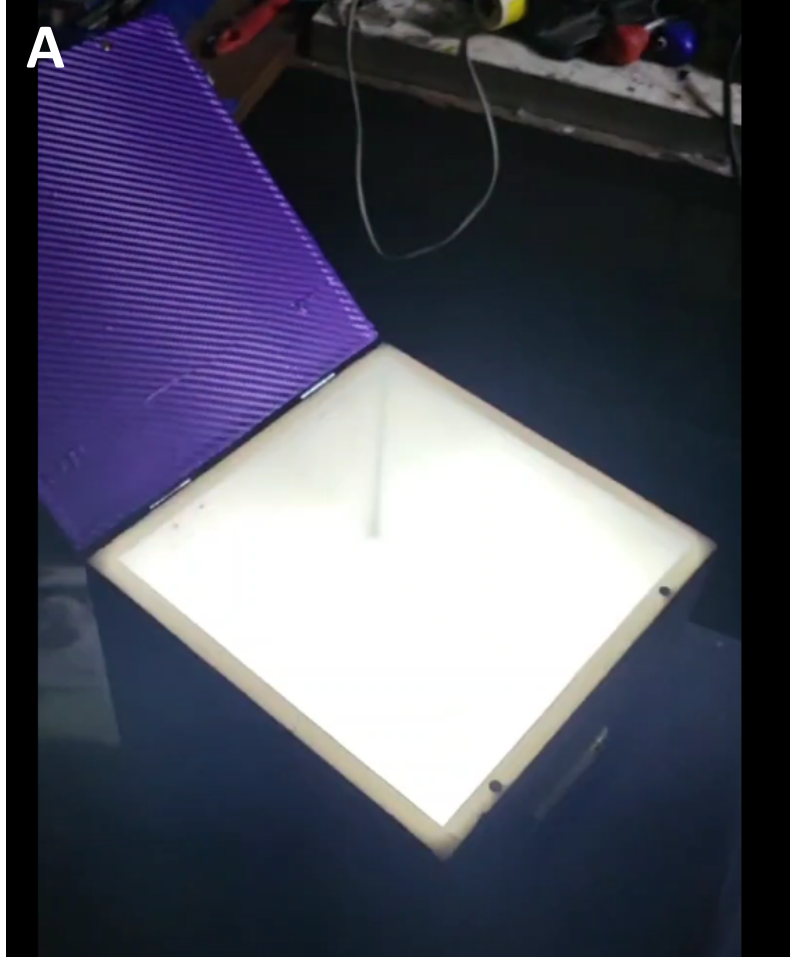

- B**
- Irradiation exposure time: 18 hours
  - Light intensity 0.28-0.30 mW/cm<sup>2</sup>

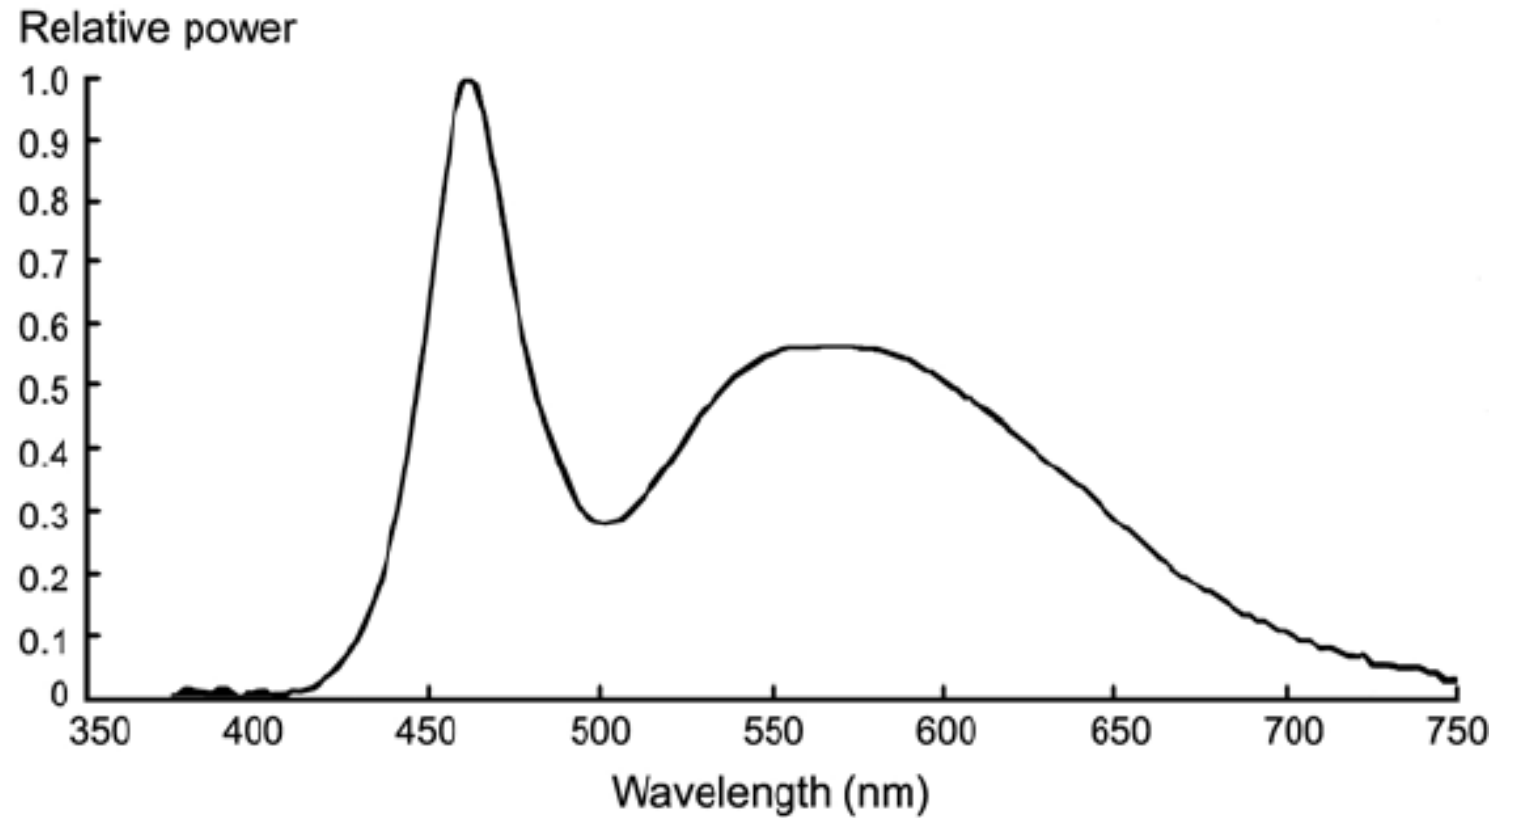

Supplementary Figure S1. A – photograph of the diode light lamp inside the plastic container, which was put into CO<sub>2</sub>-incubator; B – spectrum of the diode lamp light, which was used in the experiments.

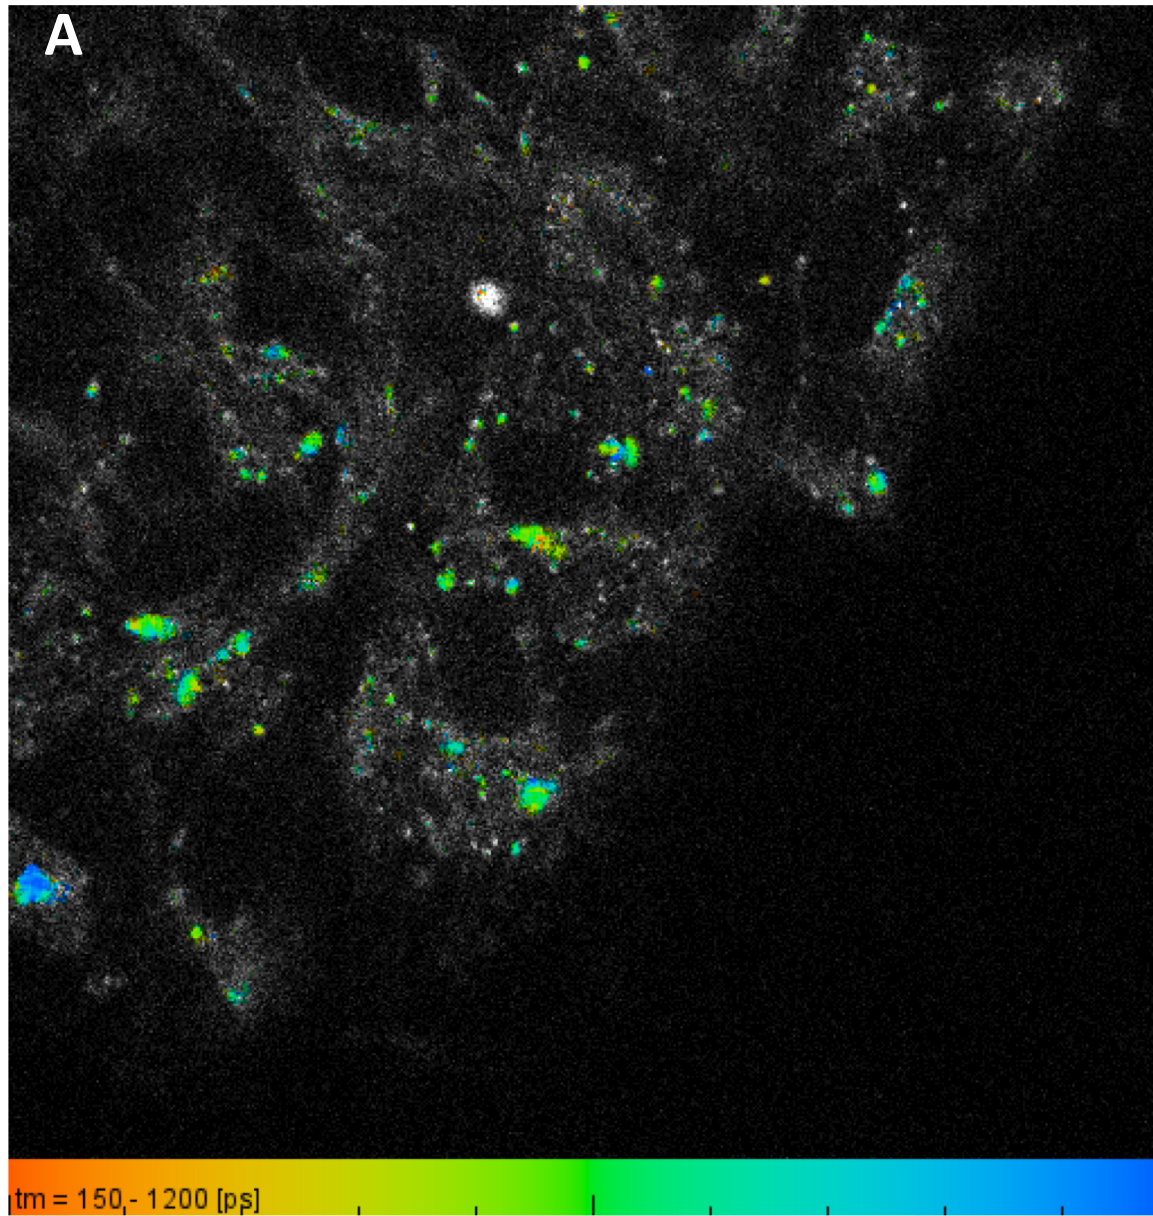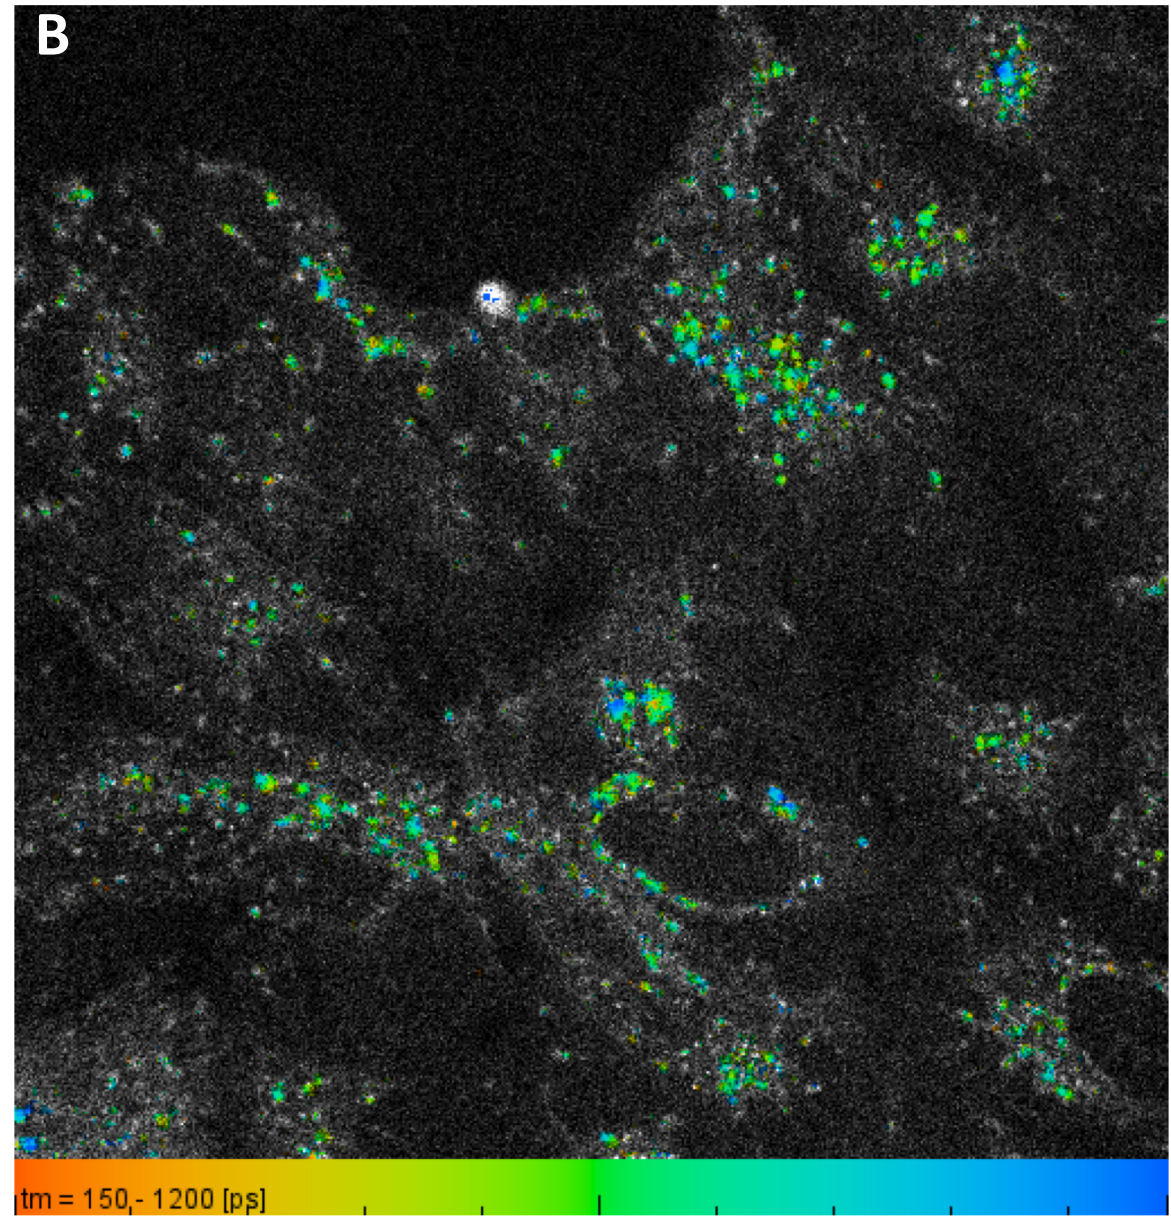

Supplementary Figure S2. Autofluorescence FLIM images of intact ARPE-19 cells: A – non-irradiated; B – irradiated with white diode lamp light. Brightness and contrast greatly (1000 times) increased.
